# Supplementary material for: One-pot synthesis of CuPt nanodendrites with enhanced activity towards methanol oxidation reaction
Source: Royal Society of Chemistry journal article supplement (doi:10.1039/c8ra00391b), 2018-01-01
Supplement: c8ra00391b1.pdf [file c8ra00391b1.pdf]

## Supplementary Information

### One-Pot Synthesis of Cu-Pt Nanodendrites with Enhanced Activity towards Methanol Oxidation Reaction

*Hongcheng Peng<sup>1</sup>, Weihong Qi<sup>1, 2, \*</sup>, Haofei Wu<sup>1</sup>, Jieting He<sup>1</sup>, Yejun Li<sup>3\*</sup>, and Haipeng Xie<sup>3</sup>*

<sup>1</sup> School of Materials Science and Engineering, Central South University, Changsha, 410083, P. R. China

<sup>2</sup> Key Laboratory of Non-ferrous Materials Science and Engineering, Ministry of Education, Changsha, 410083, P. R. China

<sup>3</sup> Hunan Key Laboratory of Super Microstructure and Ultrafast Process, School of Physics and Electronics, Central South University, Changsha, Hunan 410083, China

\* **Corresponding author:** [qiwh216@csu.edu.cn](mailto:qiwh216@csu.edu.cn); [yejun.li@csu.edu.cn](mailto:yejun.li@csu.edu.cn)

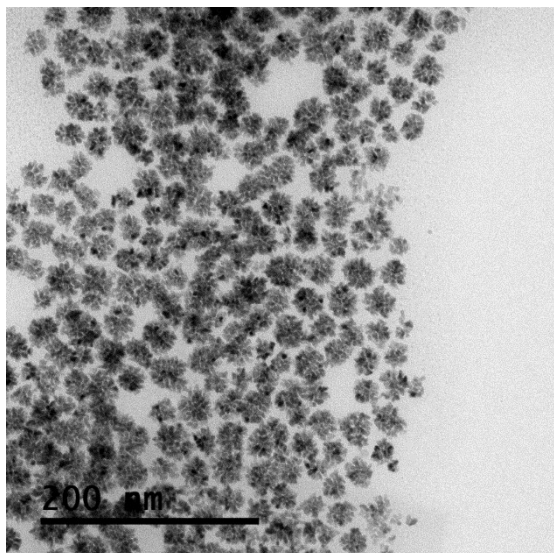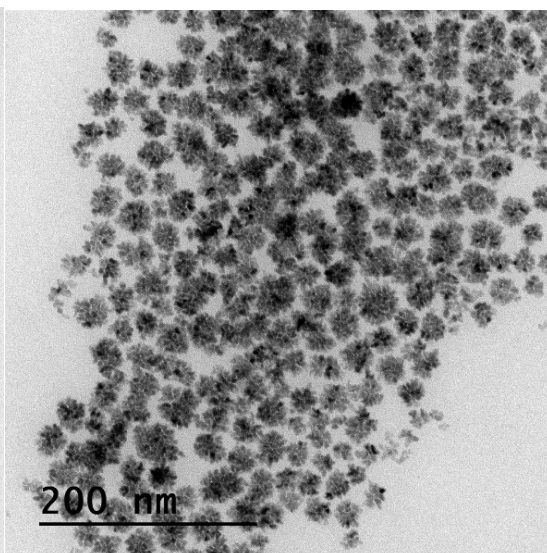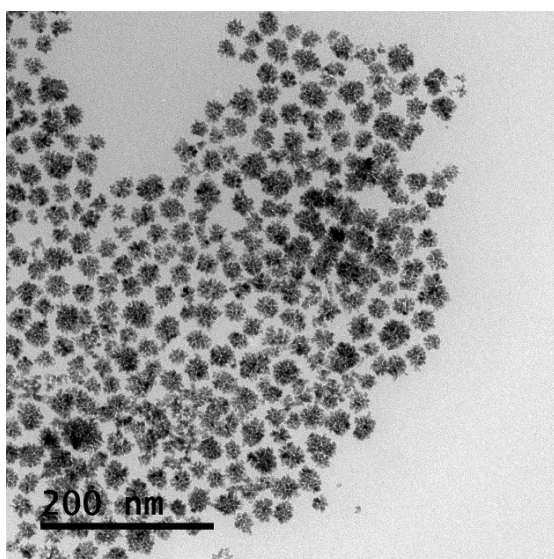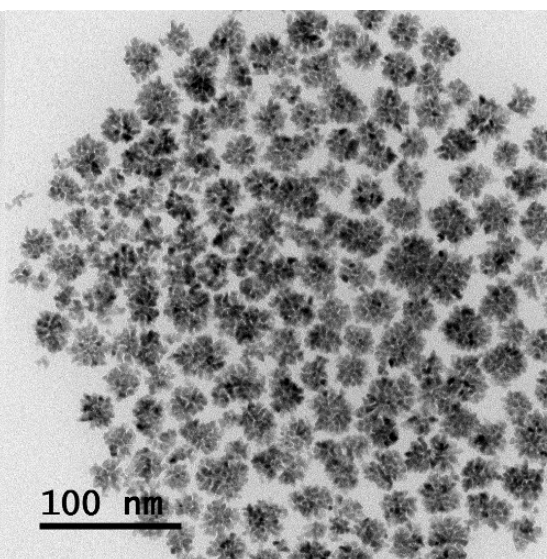

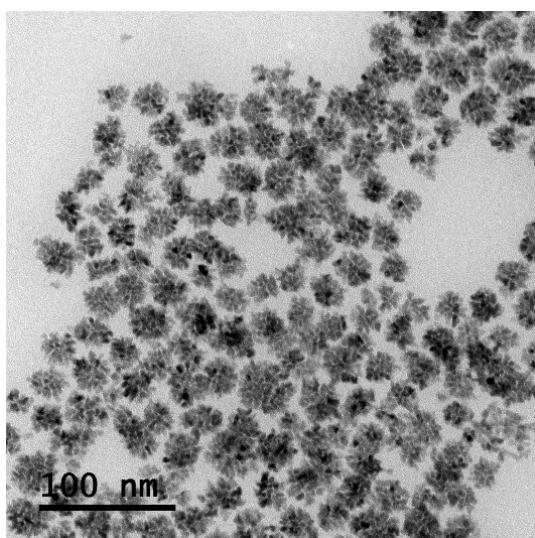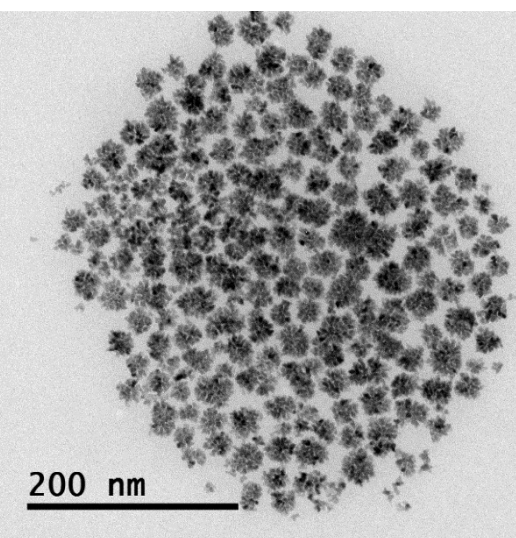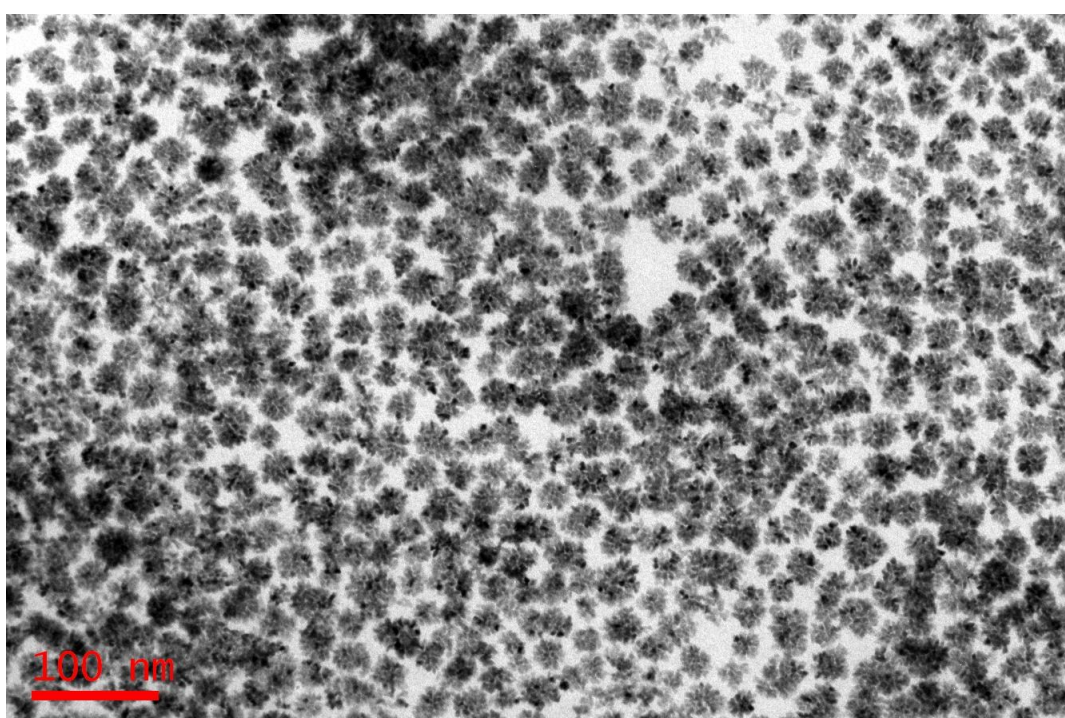



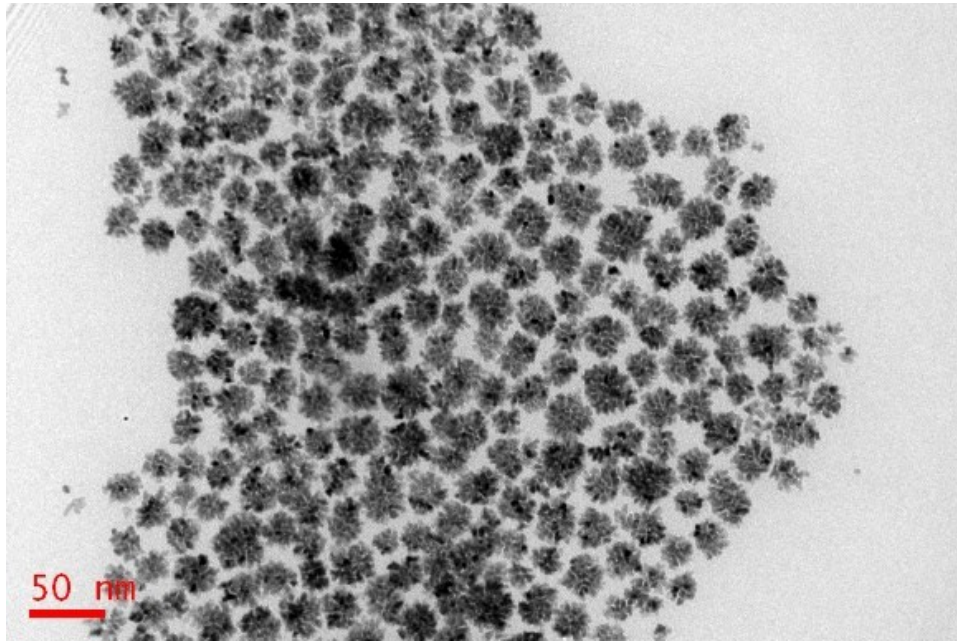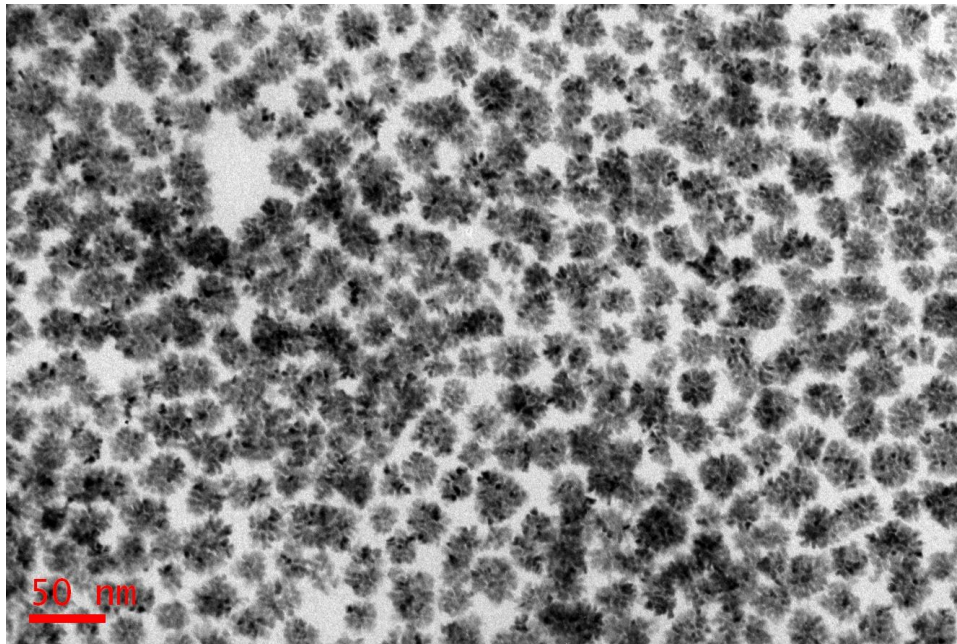

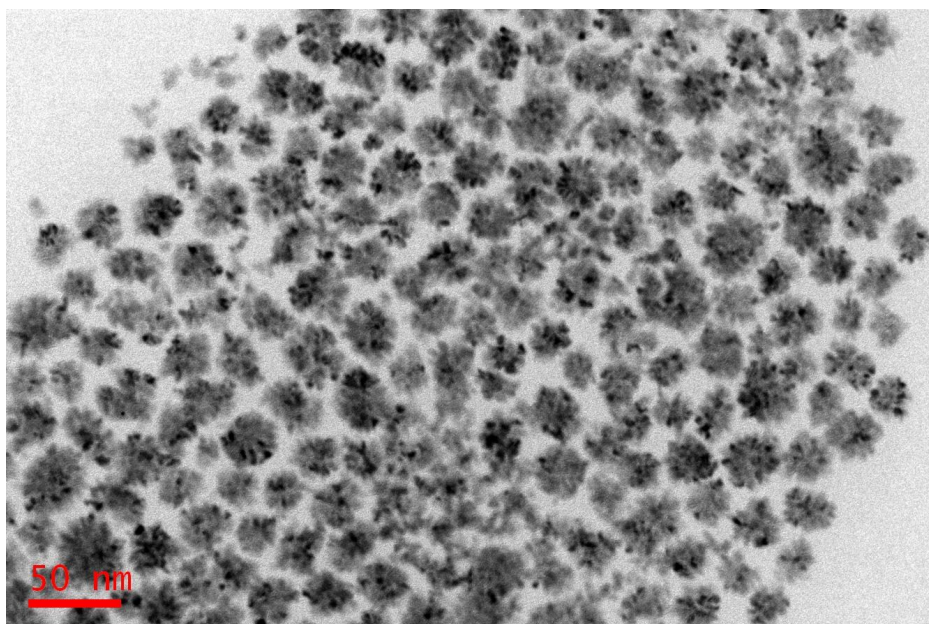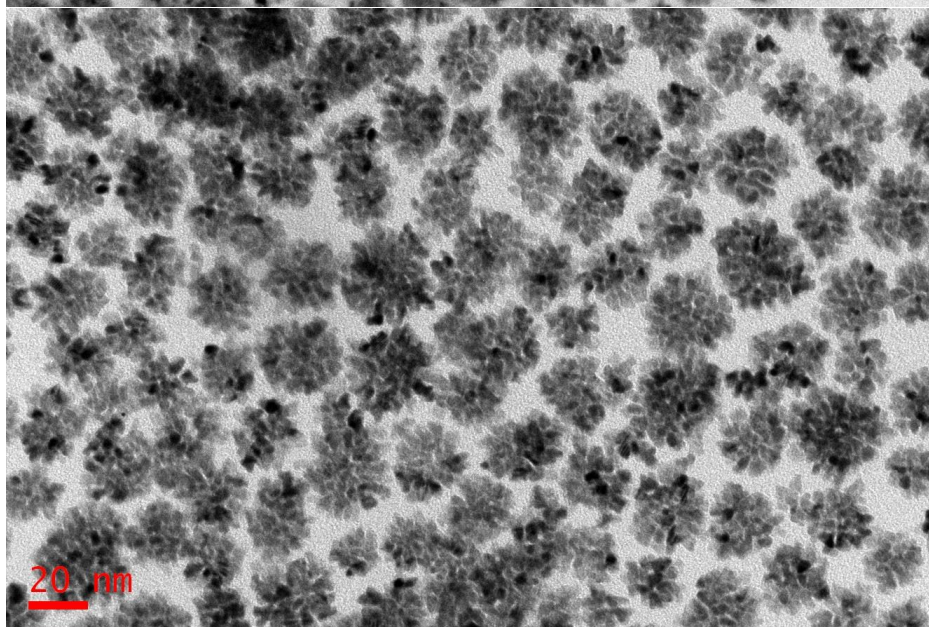



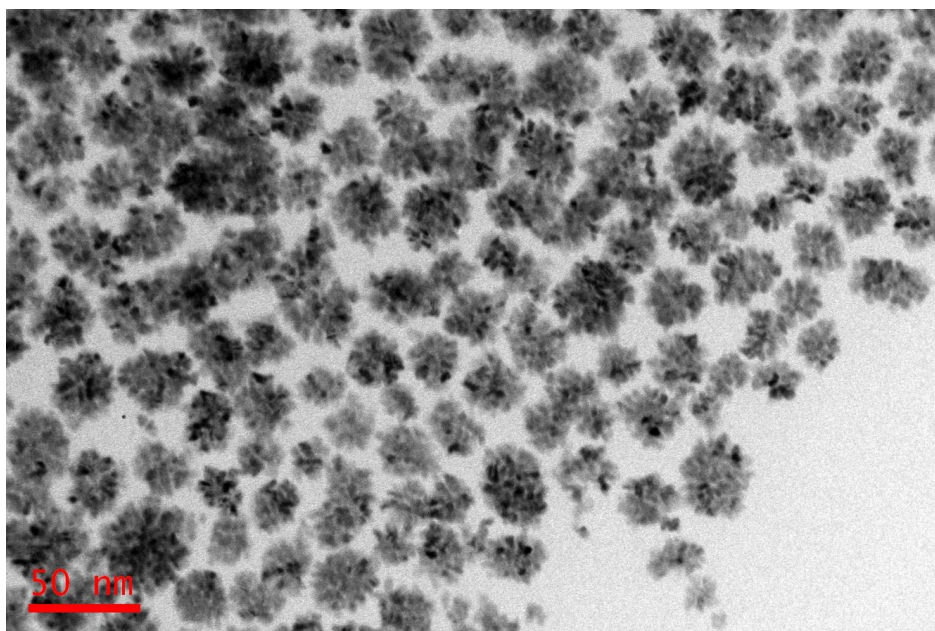

**Fig. S1.** TEM image of Cu-Pt nanodendrites measured at different positions and with different magnifications, demonstrating a highly branched structures of the synthesized samples.

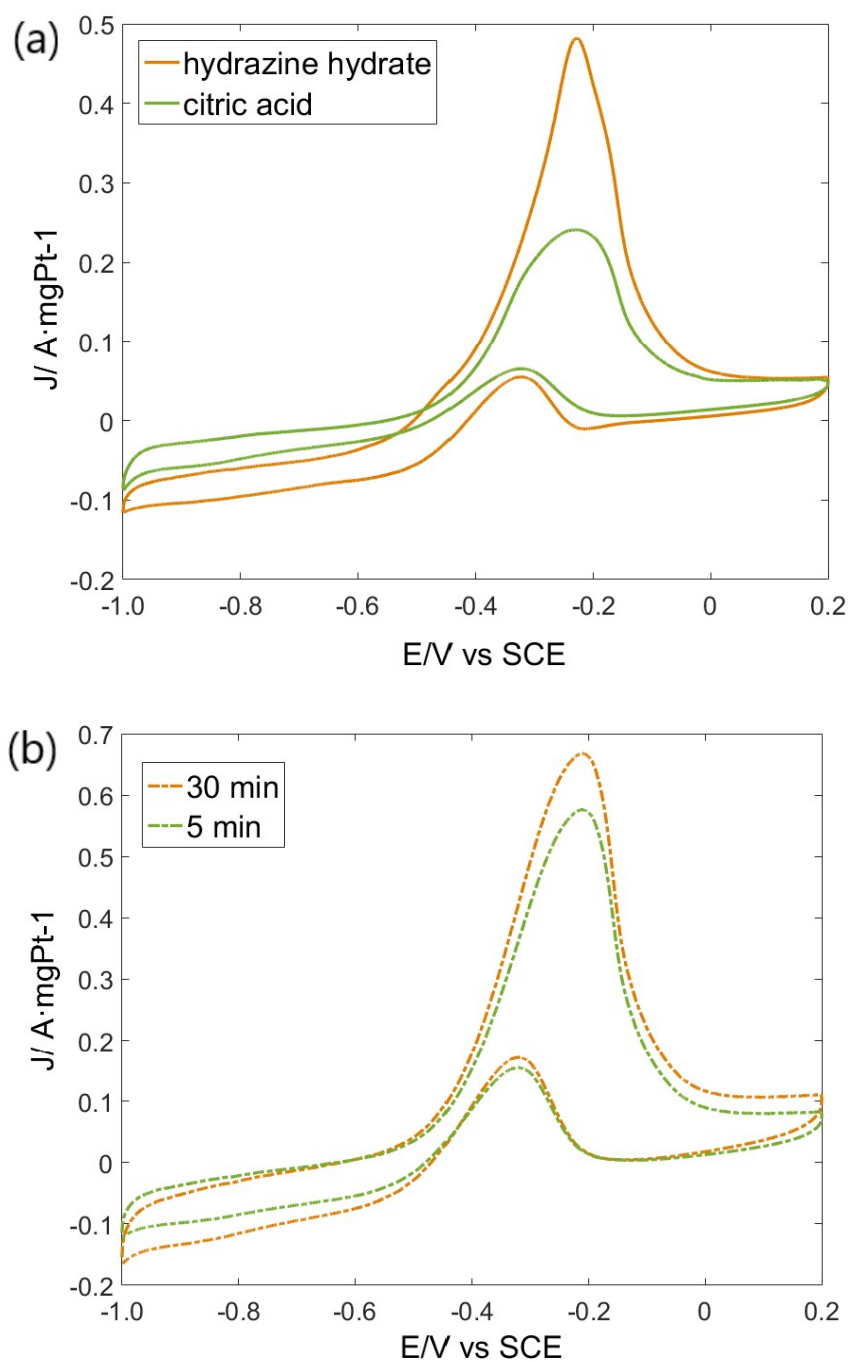

**Fig. S2.** Cyclic voltammetry (CV) curves of the products with different reducing agent (a), and with different reaction times (b) in 0.5 M NaOH and 0.5 M  $\text{CH}_3\text{OH}$  at a scan rate of  $50 \text{ mV} \cdot \text{s}^{-1}$ .
